# Supplementary material for: Enhanced stability and tunable optoelectronic properties of silicon–carbon monolayers by strain and surface functionalization
Source: Royal Society of Chemistry journal article supplement (doi:10.1039/d4tc00401a), 2024-01-01
Supplement: d4tc00401a1.pdf [file d4tc00401a1.pdf]

Supporting Information for

**Enhanced stability and tunable optoelectronic properties of novel  
silicon-carbon monolayer by strain and surface functionalization**

Huabing Shu\* and Jiyuan Guo

*School of Science, Jiangsu University of Science and Technology, Zhenjiang 212001,*

*China*

*\*E-mail: shuhuabing@just.edu.cn*

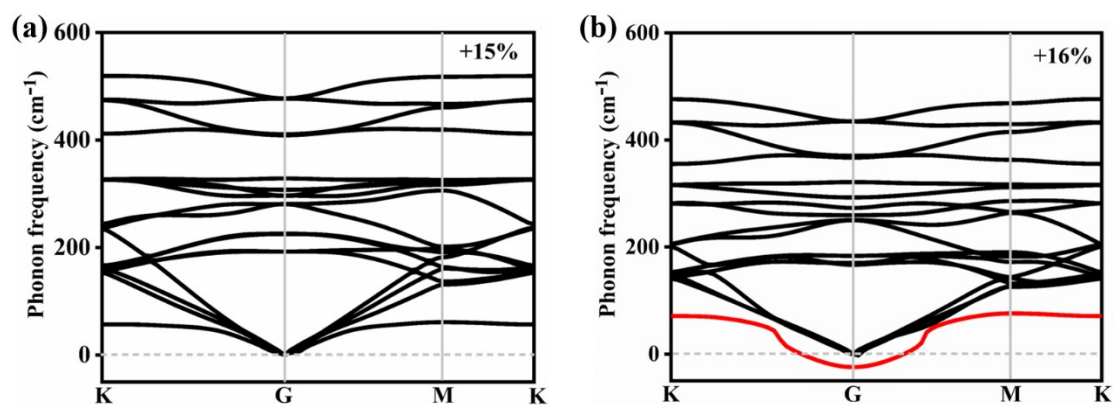

**Fig. S1** Phonon spectra of  $\text{Si}_2\text{C}$  monolayer under tensile strains of  $\delta = +15\%$  and  $+16\%$ .

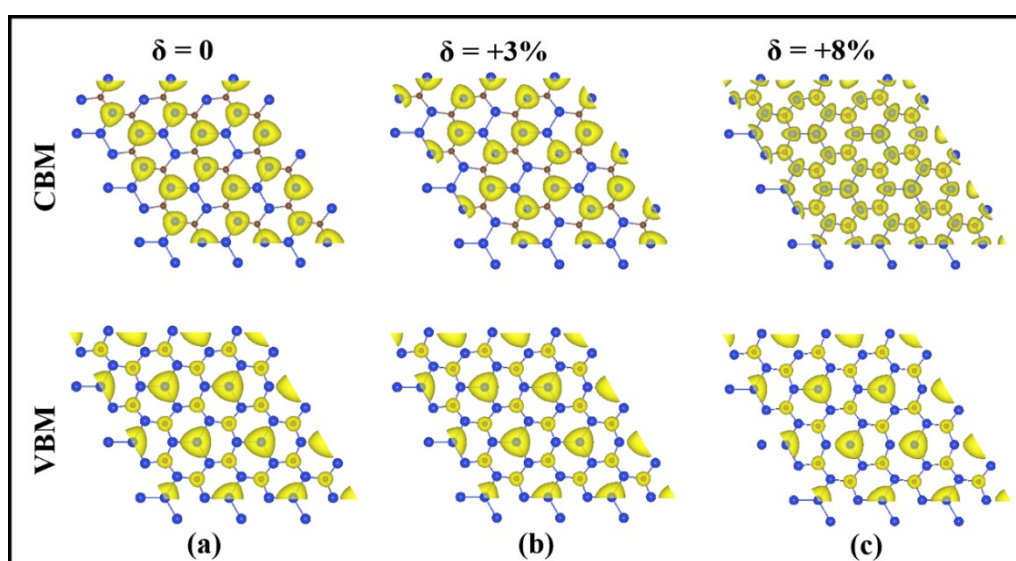

**Fig. S2** Partial charge densities of  $\text{Si}_2\text{C}$  monolayer at the biaxial tensile strain  $\delta = 0$ ,  $+3\%$ , and  $+8\%$ . (Isosurface value:  $2.0 \times 10^{-3} \text{ e}/\text{\AA}^3$ ).

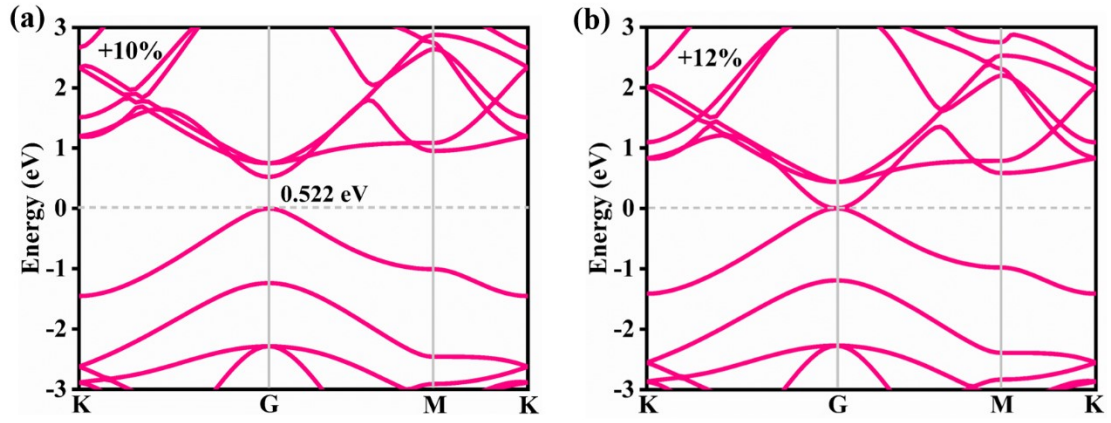

**Fig. S3** Quasi-particle band structures of Si<sub>2</sub>C monolayer at the biaxial tensile strains of +10% and +12%.

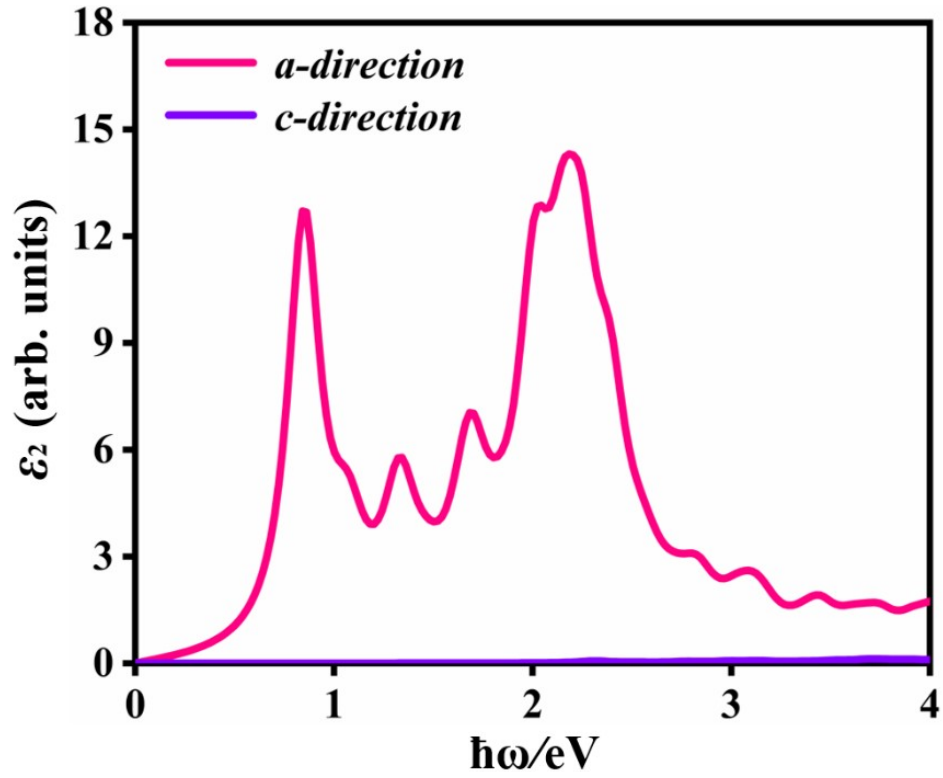

**Fig. S4** Imaginary part ( $\epsilon_2$ ) of the dielectric function of the Si<sub>2</sub>C monolayer from the  $G_0W_0$ +BSE method along the lattice vector *a* and *c*, respectively. A Lorentzian broadening of 0.10 eV is adopted in these curves.
